# Supplementary material
Source: PubMed Central journal article supplement (PMC6404567)
Supplement: fj.201801481R.sf1.pdf [file fj.201801481R.sf1.pdf]

Supplementary information for the article:

*Thy1* (CD90) expression is regulated by DNA methylation during adipogenesis

E'Lissa Flores<sup>1</sup>, Collynn Woeller\*<sup>2</sup>, Megan Falsetta<sup>2</sup>, Martha Susiarjo<sup>2</sup>, Richard Phipps<sup>1,2,3</sup>

Clinical & Translational Science Institute<sup>1</sup>, Department of Environmental Medicine<sup>2</sup>,  
Department of Microbiology and Immunology<sup>3</sup>, University of Rochester School of Medicine and  
Dentistry, Rochester, NY. \*Corresponding author, Collynn\_Woeller@urmc.rochester.edu

Please refer to materials and methods and results section of main manuscript for more information pertaining to experimental design and details.

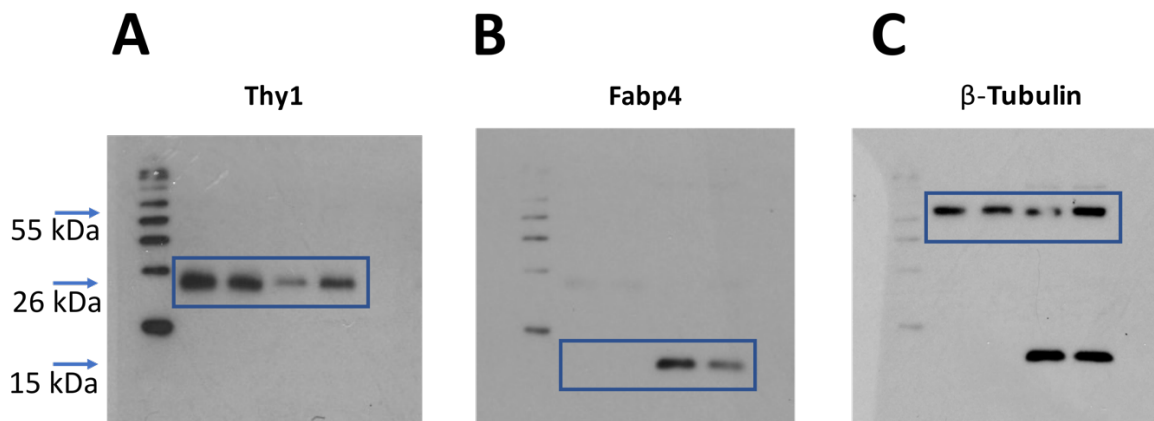

**Supplementary Fig 1:** Mouse mesenchymal stem cells. Western blots from figure 1 in main manuscript. A) Thy1 antibody bands appear at 26kDa. B) Fabp4 bands appear at 15kDa. C)  $\beta$ -Tubulin bands appear at 55kDa. Magic Mark XP protein ladder used.

**A**

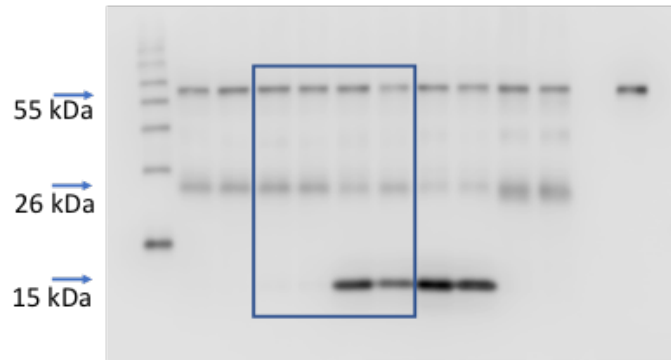

**Supplementary Fig 2:** Mouse pre-adipocyte 3T3-L1 cells. Western blots from figure 2 in main manuscript. A) Thy1 antibody bands appear at 26kDa. Fabp4 bands appear at 15kDa.  $\beta$ -Tubulin bands appear at 55kDa. Magic Mark XP protein ladder used.

**A**

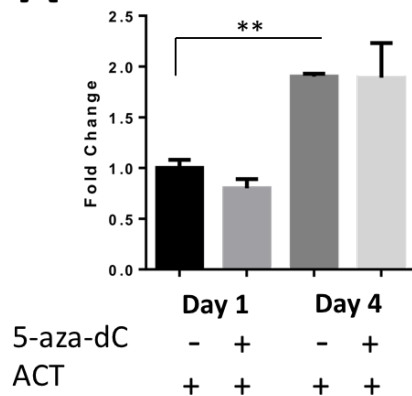

**Supplementary Fig 3:** 3T3-L1 preadipocyte cells were given the adipogenic cocktail (ACT) and treated daily with the methylation inhibitor, 5-aza-dC, and harvested on day 1 and day 4. A) As expected, there was an increase in miR-103 expression during adipogenesis. However, there were no significant changes in expression with 5-aza-dC at either time point. \*\*= $p < .001$
